# Supplementary material for: Patterned cell and matrix dynamics in branching morphogenesis
Source: PubMed Central journal article supplement — J Cell Biol. 2017 Mar 6;216(3):559–70. doi: 10.1083/jcb.201610048 (PMC5350520; doi:10.1083/jcb.201610048), 2017-03-06
Supplement: JCB_201610048_sm.pdf [file JCB_201610048_sm.pdf]

Table S1. Loss-of-function phenotypes for signaling pathway genes

| Gene                   | Organ                 | Species           | Phenotype                                                                          | References                  |
|------------------------|-----------------------|-------------------|------------------------------------------------------------------------------------|-----------------------------|
| <b>Fgf</b>             |                       |                   |                                                                                    |                             |
| <i>Fgf7</i>            | Kidney                | Mouse             | -/- Hypoplasia                                                                     | (Qiao et al., 1999)         |
| <i>Fgf8</i>            | Kidney                | Mouse             | -/- Hypoplasia, dysplasia                                                          | (Perantoni et al., 2005)    |
|                        | SMG <sup>a</sup>      | Mouse             | -/- Aplasia                                                                        | (Jaskoll et al., 2004b)     |
| <i>Fgf9</i>            | Kidney                | Mouse             | -/- No phenotype                                                                   | (Colvin et al., 2001a)      |
|                        | Lung                  | Mouse             | -/- Hypoplasia                                                                     | (Colvin et al., 2001b)      |
| <i>Fgf10</i>           | Kidney                | Mouse             | -/- Dysplasia                                                                      | (Ohuchi et al., 2000)       |
|                        | Lacrimal              | Human             | +/- Aplasia, hypoplasia <sup>b</sup>                                               | (Entesarian et al., 2005)   |
|                        | Lacrimal              | Mouse             | +/- Agenesis                                                                       | (Entesarian et al., 2005)   |
|                        | Lung                  | Mouse             | -/- Aplasia                                                                        | (Min et al., 1998)          |
|                        | Mammary               | Mouse             | -/- Dysplasia                                                                      | (Mailleux et al., 2002)     |
|                        | Pancreas              | Mouse             | -/- Hypoplasia                                                                     | (Bhushan et al., 2001)      |
|                        | Salivary <sup>b</sup> | Human             | +/- Aplasia, hypoplasia <sup>c</sup>                                               | (Entesarian et al., 2005)   |
|                        | SMG                   | Mouse             | +/- Aplasia, hypoplasia                                                            | (Entesarian et al., 2005)   |
|                        | SMG                   | Mouse             | -/- Agenesis                                                                       | (Ohuchi et al., 2000)       |
|                        | Trachea               | Mouse             | -/- Aplasia                                                                        | (Min et al., 1998)          |
| <i>Fgf20</i>           | Kidney                | Human             | -/- Agenesis                                                                       | (Barak et al., 2012)        |
| <i>Fgf9; Fgf20</i>     | Kidney                | Mouse             | <i>Fgf9</i> <sup>-/-</sup> ; <i>Fgf20</i> <sup>+/-</sup> No phenotype              | (Barak et al., 2012)        |
|                        |                       | Mouse             | <i>Fgf9</i> <sup>-/-</sup> ; <i>Fgf20</i> <sup>+/-</sup> No phenotype              | (Barak et al., 2012)        |
|                        |                       | Mouse             | <i>Fgf9</i> <sup>+/-</sup> ; <i>Fgf20</i> <sup>-/-</sup> Hypoplasia                | (Barak et al., 2012)        |
|                        |                       | Mouse             | <i>Fgf9</i> <sup>-/-</sup> ; <i>Fgf20</i> <sup>-/-</sup> Agenesis                  | (Barak et al., 2012)        |
| <i>Fgfr1; Fgfr2</i>    | Kidney                | Mouse             | <i>Fgfr1</i> <sup>-/-</sup> ; <i>Fgfr2</i> <sup>-/-</sup> Aplasia                  | (Poladia et al., 2006)      |
| <i>Fgfr1; Fgfr2llc</i> | Kidney                | Mouse             | <i>Fgfr1</i> <sup>-/-</sup> ; <i>Fgfr2llc</i> <sup>-/-</sup> Dysplasia, hypoplasia | (Sims-Lucas et al., 2011)   |
| <i>Fgfr2</i>           | Kidney                | Human             | -/- Dysplasia <sup>d</sup>                                                         | (Reardon et al., 1994)      |
|                        | Lung                  | Mouse             | -/- Agenesis                                                                       | (De Moerlooze et al., 2000) |
|                        | Mammary               | Mouse             | -/- Dysplasia                                                                      | (Mailleux et al., 2002)     |
|                        | SMG                   | Mouse             | -/- Agenesis                                                                       | (De Moerlooze et al., 2000) |
| <i>Fgfr3; Fgfr4</i>    | Lung                  | Mouse             | <i>Fgfr3</i> <sup>-/-</sup> ; <i>Fgfr4</i> <sup>-/-</sup> Dysplasia                | (Weinstein et al., 1998)    |
| <i>Fgfr4</i>           | Lung                  | Mouse             | -/- No phenotype                                                                   | (Weinstein et al., 1998)    |
| <i>Bnl</i>             | Trachea               | <i>Drosophila</i> | -/- Dysplasia (branching)                                                          | (Sutherland et al., 1996)   |
| <i>Btl</i>             | Trachea               | <i>Drosophila</i> | -/- Impaired cell migration and branching                                          | (Klämbt et al., 1992)       |
| <i>Spry1</i>           | Kidney                | Mouse             | -/- Cystic hyperplasia                                                             | (Basson et al., 2006)       |
| <i>Spry1; Spry2</i>    | Lung                  | Mouse             | <i>Spry1</i> <sup>-/-</sup> ; <i>Spry2</i> <sup>-/-</sup> Dysplasia (airway)       | (Tang et al., 2011)         |
|                        | SMG                   | Mouse             | <i>Spry1</i> <sup>-/-</sup> ; <i>Spry2</i> <sup>-/-</sup> Dysplasia, hypoplasia    | (Knosp et al., 2015)        |
| <b>Egf</b>             |                       |                   |                                                                                    |                             |
| <i>Egfr</i>            | Lung                  | Mouse             | -/- Dysplasia                                                                      | (Miettinen et al., 1997)    |
|                        | Mammary               | Mouse             | -/- Dysplasia                                                                      | (Wiesen et al., 1999)       |
|                        | Pancreas              | Mouse             | -/- Dysplasia                                                                      | (Miettinen et al., 2000)    |
|                        | SMG                   | Mouse             | -/- Dysplasia                                                                      | (Jaskoll and Melnick, 1999) |
| <i>Hb-egf</i>          | Lung                  | Mouse             | -/- Dysplasia, hypoplasia                                                          | (Jackson et al., 2003)      |
| <b>Tgf</b>             |                       |                   |                                                                                    |                             |
| <i>Tgf-β2</i>          | SMG                   | Mouse             | -/- No phenotype                                                                   | (Jaskoll and Melnick, 1999) |
| <i>Tgf-β3</i>          | SMG                   | Mouse             | -/- No phenotype                                                                   | (Jaskoll and Melnick, 1999) |
| <i>TβRII</i>           | Lung                  | Mouse             | -/- Dysplasia                                                                      | (Li et al., 2008)           |
| <i>Lefty1</i>          | Lung                  | Mouse             | -/- Left pulmonary isomerism                                                       | (Meno et al., 1998)         |
| <b>Gdnf</b>            |                       |                   |                                                                                    |                             |
| <i>Gdnf</i>            | Kidney                | Mouse             | -/- Agenesis                                                                       | (Pichel et al., 1996)       |
| <i>GFRα1</i>           | Kidney                | Mouse             | -/- Agenesis                                                                       | (Enomoto et al., 1998)      |
| <i>Ret</i>             | Kidney                | Mouse             | -/- Agenesis, dysplasia                                                            | (Schuchardt et al., 1994)   |
| <b>Wnt</b>             |                       |                   |                                                                                    |                             |
| <i>Wnt4</i>            | Kidney                | Mouse             | -/- Dysplasia, hypoplasia                                                          | (Stark et al., 1994)        |
|                        | Lung                  | Mouse             | -/- Hypoplasia                                                                     | (Caprioli et al., 2015)     |
|                        | Trachea               | Mouse             | -/- Dysplasia                                                                      | (Caprioli et al., 2015)     |
| <i>Wnt5a</i>           | Kidney                | Mouse             | -/- Dysplasia                                                                      | (Pietilä et al., 2016)      |
| <i>Wnt7b</i>           | Kidney                | Mouse             | -/- Deficient medulla                                                              | (Yu et al., 2009)           |
| <i>Wnt9b</i>           | Kidney                | Mouse             | -/- Dysplasia (branching), hypoplasia                                              | (Carroll et al., 2005)      |
| <i>Wnt11</i>           | Kidney                | Mouse             | -/- Mild hypoplasia, dysplasia                                                     | (Majumdar et al., 2003)     |
| <i>Wnt11; Ret</i>      | Kidney                | Mouse             | <i>Wnt11</i> <sup>+/-</sup> ; <i>Ret</i> <sup>-/-</sup> Moderate hypoplasia        | (Majumdar et al., 2003)     |
|                        |                       | Mouse             | <i>Wnt11</i> <sup>+/-</sup> ; <i>Ret</i> <sup>-/-</sup> Severe hypoplasia          | (Majumdar et al., 2003)     |

Table S1. Loss-of-function phenotypes for signaling pathway genes (Continued)

| Gene                     | Organ    | Species           | Phenotype                                    | References                   |
|--------------------------|----------|-------------------|----------------------------------------------|------------------------------|
| <b>Bmp</b>               |          |                   |                                              |                              |
| <i>Bmp4</i>              | Kidney   | Mouse             | +/- Dysplasia, hypoplasia                    | (Miyazaki et al., 2000)      |
|                          | Lung     | Mouse             | -/- Dysplasia                                | (Eblaghie et al., 2006)      |
| <i>Bmp7</i>              | Kidney   | Mouse             | -/- Dysplasia                                | (Dudley et al., 1995)        |
| <i>Bmpr1a</i>            | Lung     | Mouse             | -/- Dysplasia                                | (Eblaghie et al., 2006)      |
| <i>Dpp</i>               | Trachea  | <i>Drosophila</i> | -/- Impaired cell migration and branching    | (Vincent et al., 1997)       |
| <b>Pdgf</b>              |          |                   |                                              |                              |
| <i>Pdgf-a</i>            | Lung     | Mouse             | -/- Dysplasia (alveogenesis)                 | (Boström et al., 2002)       |
| <i>Pdgfar</i>            | Lung     | Mouse             | -/- Hypoplasia                               | (Boström et al., 2002)       |
| <b>Eda</b>               |          |                   |                                              |                              |
| <i>Eda</i>               | -        | Human             | +/- or -/- Ectodermal dysplasia <sup>a</sup> | (Kere et al., 1996)          |
| <i>Edar<sup>dl</sup></i> | -        | Human             | +/- or -/- Ectodermal dysplasia              | (Monreal et al., 1999)       |
|                          | SMG      | Mouse             | -/- Dysplasia                                | (Jaskoll et al., 2003)       |
| <i>Eda<sup>ta</sup></i>  | SMG      | Mouse             | -/- Hypoplasia                               | (Jaskoll et al., 2003)       |
| <b>Others</b>            |          |                   |                                              |                              |
| <i>Adam17 (Tace)</i>     | Lung     | Mouse             | -/- Hypoplasia                               | (Zhao et al., 2001)          |
|                          | Mammary  | Mouse             | -/- Dysplasia (branching)                    | (Sternlicht et al., 2005)    |
| <i>C-met (Hgf)</i>       | Lung     | Mouse             | -/- Dysplasia                                | (Yamamoto et al., 2007)      |
| <i>Dll</i>               | Vascular | Mouse             | +/- Aplasia (sprouting and branching)        | (Napp et al., 2012)          |
| <i>Dnm2</i>              | Vascular | Mouse             | -/- Dysplasia                                | (Lee et al., 2014)           |
| <i>Igf-Ir</i>            | Mammary  | Mouse             | -/- Hypoplasia                               | (Bonnette and Hadsell, 2001) |
| <i>Irs-1/2</i>           | Mammary  | Mouse             | -/- Hypoplasia                               | (Heckman et al., 2007)       |
| <i>P120</i>              | SMG      | Mouse             | -/- Dysplasia                                | (Davis and Reynolds, 2006)   |
| <i>P190-B</i>            | Mammary  | Mouse             | -/- Hypoplasia                               | (Heckman et al., 2007)       |
| <i>Shh</i>               | Lung     | Mouse             | -/- Aplasia, dysplasia                       | (Pepicelli et al., 1998)     |
|                          | Pancreas | Mouse             | -/- Hyperplasia                              | (Hebrok et al., 2000)        |
|                          | SMG      | Mouse             | -/- Aplasia, dysplasia                       | (Jaskoll et al., 2004a)      |
| <i>Vegf-A</i>            | Lung     | Mouse             | -/- Dysplasia                                | (Yamamoto et al., 2007)      |

The list of signaling pathway genes may not be complete. +/+, wild type; +/-, heterozygous; -/-, homozygous. Agenesis is defined here based on the published study as a failure of organ formation, aplasia as incomplete development, dysplasia as abnormal development, hyperplasia as increased size, and hypoplasia as underdevelopment. *Bmp*, bone morphogenetic protein; *Bnl*, branchless; *Btl*, breathless; *Dll*, delta-like ligand; *Dnm*, dynamin; *Dpp*, decapentaplegic; *Eda*, ectodysplasin A; *Edar<sup>dl</sup>*, ectodysplasin-A receptor, downless; *Fgf*, fibroblast growth factor; *Gdnf*, glial cell line-derived neurotrophic factor; *Hb-egf*, heparin-binding epidermal growth factor; *Hgf*, hepatocyte growth factor; *Hgfr*, hepatocyte growth factor receptor; *Igf*, insulin-like growth factor; *Irs*, insulin receptor substrate; *Pdgf*, platelet-derived growth factor; *Pdgfr*, platelet-derived growth factor receptor; *Shh*, sonic hedgehog; *Spry*, sprouty; *Tace*, tumor necrosis factor- $\alpha$ -converting enzyme; *Tgf*, transforming growth factor; *Vegf*, vascular endothelial growth factor.

<sup>a</sup>SMG, submandibular salivary gland.

<sup>b</sup>Salivary, major salivary glands.

<sup>c</sup>In aplasia of lacrimal and salivary glands (ALSG).

<sup>d</sup>In some cases, renal dysplasia is observed.

<sup>e</sup>Hypohidrotic ectodermal dysplasia is characterized by dysplasia of hair, teeth, and several exocrine glands.

Table S2. Loss-of-function phenotypes for transcription factors

| Gene                  | Organ                 | Species           | Phenotype                                                                                                | References                      |
|-----------------------|-----------------------|-------------------|----------------------------------------------------------------------------------------------------------|---------------------------------|
| <b>Homeobox</b>       |                       |                   |                                                                                                          |                                 |
| <i>Hoxa11 Hoxd11</i>  | Kidney                | Mouse             | -/- No phenotype                                                                                         | (Patterson et al., 2001)        |
|                       | Kidney                | Mouse             | -/- No phenotype                                                                                         | (Patterson et al., 2001)        |
| <i>Hoxa11; Hoxd11</i> | Kidney                | Mouse             | <i>Hoxa11</i> <sup>-/-</sup> ; <i>Hoxd11</i> <sup>-/-</sup> Agenesis, aplasia                            | (Patterson et al., 2001)        |
| <i>Pax2</i>           | Kidney                | Human             | +/- Hypoplasia, renal impairment                                                                         | (Sanyanusin et al., 1995)       |
|                       | Kidney                | Mouse             | -/- Aplasia (no ureteric bud outgrowth)                                                                  | (Brophy et al., 2001)           |
| <i>Pdx1</i>           | Pancreas              | Mouse             | -/- Aplasia (rudimentary bud), dysplasia                                                                 | (Offield et al., 1996)          |
| <i>Nkx2.1</i>         | Lung                  | Mouse             | -/- Hypoplasia, dysplasia                                                                                | (Minoo et al., 1999)            |
| <i>Nkx2.3</i>         | Sublingual            | Mouse             | -/- Dysplasia                                                                                            | (Biben et al., 2002)            |
| <i>Nkx3.1</i>         | Prostate              | Mouse             | +/- Mild hypoplasia and dysplasia                                                                        | (Bhatia-Gaur et al., 1999)      |
|                       | Prostate              | Mouse             | -/- Hypoplasia, dysplasia                                                                                | (Bhatia-Gaur et al., 1999)      |
|                       | Prostate              | Mouse             | -/- Hypoplasia, dysplasia (duct)                                                                         | (Schneider et al., 2000)        |
|                       | Minor SG <sup>a</sup> | Mouse             | -/- Hypoplasia, dysplasia (duct)                                                                         | (Schneider et al., 2000)        |
| <b>Ets</b>            |                       |                   |                                                                                                          |                                 |
| <i>Etv4</i>           | Kidney                | Mouse             | -/- Occasional agenesis                                                                                  | (Lu et al., 2009)               |
| <i>Etv4; Etv5</i>     | Kidney                | Mouse             | <i>Etv4</i> <sup>+/-</sup> ; <i>Etv5</i> <sup>+/-</sup> Occasional agenesis                              | (Lu et al., 2009)               |
|                       |                       | Mouse             | <i>Etv4</i> <sup>-/-</sup> ; <i>Etv5</i> <sup>-/-</sup> Dysplasia                                        | (Lu et al., 2009)               |
|                       |                       | Mouse             | <i>Etv4</i> <sup>-/-</sup> ; <i>Etv5</i> <sup>-/-</sup> Agenesis, severe hypoplasia and dysplasia        | (Lu et al., 2009)               |
| <b>Fox</b>            |                       |                   |                                                                                                          |                                 |
| <i>Foxa1</i>          | Lung                  | Mouse             | -/- Delayed development, no postnatal phenotype                                                          | (Besnard et al., 2005)          |
| <i>Foxa2</i>          | Lung                  | Mouse             | -/- Dysplasia, goblet cell hyperplasia                                                                   | (Wan et al., 2004)              |
| <i>Foxa1; Foxa2</i>   | Lung                  | Mouse             | <i>Foxa1</i> <sup>-/-</sup> ; <i>Foxa2</i> <sup>-/-</sup> Dysplasia, hypoplasia                          | (Wan et al., 2005)              |
| <b>Gata</b>           |                       |                   |                                                                                                          |                                 |
| <i>Gata3</i>          | Kidney                | Human             | +/- Hypoplasia, dysplasia, aplasia <sup>b</sup>                                                          | (Ali et al., 2007)              |
|                       |                       | Mouse             | -/- Dysplasia                                                                                            | (Grote et al., 2008)            |
| <i>Gata4</i>          | Pancreas              | Human             | +/- Agenesis <sup>c</sup>                                                                                | (Shaw-Smith et al., 2014)       |
|                       | Pancreas              | Mouse             | -/- Agenesis (ventral pancreas)                                                                          | (Watt et al., 2007)             |
|                       | Pancreas              | Mouse             | -/- Mild dysplasia                                                                                       | (Xuan et al., 2012)             |
| <i>Gata5</i>          | Kidney                | Mouse             | -/- No phenotype                                                                                         | (Molkentin et al., 2000)        |
|                       | Lung                  | Mouse             | -/- No phenotype                                                                                         | (Molkentin et al., 2000)        |
| <i>Gata6</i>          | Pancreas              | Human             | +/- Agenesis                                                                                             | (Lango Allen et al., 2011)      |
|                       | Pancreas              | Mouse             | -/- Mild dysplasia                                                                                       | (Xuan et al., 2012)             |
| <i>Gata4; Gata6</i>   | Pancreas              | Mouse             | <i>Gata4</i> <sup>-/-</sup> ; <i>Gata6</i> <sup>-/-</sup> Agenesis                                       | (Xuan et al., 2012)             |
| <b>Myc</b>            |                       |                   |                                                                                                          |                                 |
| <i>N-Myc</i>          | Lung                  | Mouse             | -/- Hypoplasia                                                                                           | (Moens et al., 1992)            |
| <i>c-Myc</i>          | Vascular              | Mouse             | -/- Aplasia                                                                                              | (Baudino et al., 2002)          |
| <b>Pas</b>            |                       |                   |                                                                                                          |                                 |
| <i>Npas3</i>          | Lung                  | Mouse             | -/- Dysplasia (branching)                                                                                | (Zhou et al., 2009)             |
| <i>Trh</i>            | Trachea               | <i>Drosophila</i> | -/- Aplasia (no tubulogenesis)                                                                           | (Isaac and Andrew, 1996)        |
|                       | SMG                   | <i>Drosophila</i> | -/- Aplasia (no tubulogenesis)                                                                           | (Isaac and Andrew, 1996)        |
| <b>Sox</b>            |                       |                   |                                                                                                          |                                 |
| <i>Sox4</i>           | Pancreas              | Mouse             | -/- Dysplasia                                                                                            | (Wilson et al., 2005)           |
| <i>Sox8; Sox9</i>     | Kidney                | Mouse             | <i>Sox8</i> <sup>-/-</sup> ; <i>Sox9</i> <sup>+/-</sup> Hypoplasia                                       | (Reginensi et al., 2011)        |
|                       |                       | Mouse             | <i>Sox8</i> <sup>-/-</sup> ; <i>Sox9</i> <sup>-/-</sup> Almost agenesis                                  | (Reginensi et al., 2011)        |
| <i>Sox9</i>           | Kidney                | Human             | +/- Renal malrotation, nephrocalcinosis                                                                  | (Cost et al., 2009)             |
|                       | Lung                  | Mouse             | +/- Dysplasia, hypoplasia <sup>d</sup>                                                                   | (Foster et al., 1994)           |
|                       | Lung                  | Mouse             | -/- ( <i>Shh</i> <sup>Cre</sup> ) Hypoplasia, dysplasia                                                  | (Chang et al., 2013)            |
| <i>Sox11</i>          | Pancreas              | Mouse             | -/- Hypoplasia                                                                                           | (Seymour et al., 2007)          |
|                       | Lung                  | Mouse             | -/- Hypoplasia                                                                                           | (Sock et al., 2004)             |
|                       | Pancreas              | Mouse             | -/- Hypoplasia                                                                                           | (Sock et al., 2004)             |
| <i>Sox17</i>          | Lung                  | Mouse             | -/- Microvasculature, hypoperfusion                                                                      | (Lange et al., 2014)            |
| <b>Ptf1</b>           |                       |                   |                                                                                                          |                                 |
| <i>Ptf1a</i>          | Pancrea               | Human             | -/- Agenesis <sup>e</sup>                                                                                | (Sellick et al., 2004)          |
|                       | Pancreas              | Mouse             | -/- Aplasia, hypoplasia                                                                                  | (Kawaguchi et al., 2002)        |
| <i>Ptf1-p48</i>       | Pancreas              | Mouse             | -/- Agenesis                                                                                             | (Krapp et al., 1998)            |
| <b>Tcf/Lef</b>        |                       |                   |                                                                                                          |                                 |
| <i>Lef1</i>           | Trachea               | Mouse             | -/- Agenesis (submucosal gland)                                                                          | (Duan et al., 1999)             |
| <i>Tcf2</i>           | Pancreas              | Mouse             | -/- Agenesis                                                                                             | (Haumaitre et al., 2005)        |
| <b>T-box</b>          |                       |                   |                                                                                                          |                                 |
| <i>Tbx2</i>           | Mammary               | Mouse             | -/- No phenotype                                                                                         | (Jerome-Majewska et al., 2005)  |
| <i>Tbx3</i>           | Mammary               | Human             | +/- Ulnar-mammary syndrome                                                                               | (Bamshad et al., 1997)          |
|                       |                       | Mouse             | -/- Aplasia                                                                                              | (Davenport et al., 2003)        |
|                       |                       | Mouse             | +/- Aplasia, dysplasia (nipple and ductal tree)                                                          | (Douglas and Papaioannou, 2013) |
| <i>Tbx2; Tbx3</i>     | Mammary               | Mouse             | <i>Tbx2</i> <sup>-/-</sup> ; <i>Tbx3</i> <sup>+/-</sup> ↑ aplasia compared to <i>Tbx3</i> <sup>-/-</sup> | (Jerome-Majewska et al., 2005)  |

Table S2. Loss-of-function phenotypes for transcription factors (Continued)

| Gene                       | Organ    | Species | Phenotype                                                                                        | References                |
|----------------------------|----------|---------|--------------------------------------------------------------------------------------------------|---------------------------|
| <b>Rar</b>                 |          |         |                                                                                                  |                           |
| <i>Rara</i> ; <i>Rarb2</i> | Kidney   | Mouse   | <i>Rar-α<sup>-/-</sup></i> ; <i>Rar-β2<sup>-/-</sup></i> Hypoplasia, Hydronephrosis              | (Mendelsohn et al., 1994) |
|                            | Lung     | Mouse   | <i>Rar-α1<sup>-/-</sup></i> ; <i>Rar-β2<sup>-/-</sup></i> Agenesis (left), hypoplasia, dysplasia | (Mendelsohn et al., 1994) |
| <i>Rara</i> ; <i>Rary</i>  | Kidney   | Mouse   | <i>Rara<sup>-/-</sup></i> ; <i>Rary<sup>-/-</sup></i> Agenesis, aplasia                          | (Mendelsohn et al., 1994) |
|                            | Lung     | Mouse   | <i>Rara<sup>-/-</sup></i> ; <i>Rary<sup>-/-</sup></i> Dysplasia                                  | (Mendelsohn et al., 1994) |
| <i>Rarb2</i> ; <i>Rary</i> | Kidney   | Mouse   | <i>Rarb2<sup>-/-</sup></i> ; <i>Rary<sup>-/-</sup></i> Hydronephrosis                            | (Mendelsohn et al., 1994) |
| <b>Others</b>              |          |         |                                                                                                  |                           |
| <i>Hes1<sup>f</sup></i>    | Lung     | Mouse   | -/- Dysplasia (nodule), hypoplasia                                                               | (Ito et al., 2000)        |
| <i>Nfib</i>                | Lung     | Mouse   | -/- Hypoplasia                                                                                   | (Gründer et al., 2002)    |
| <i>Pdx1</i> ; <i>Sox9</i>  | Pancreas | Mouse   | <i>Pdx1<sup>-/-</sup></i> ; <i>Sox9<sup>-/-</sup></i> Agenesis (ventral), hypoplasia (dorsal)    | (Shih et al., 2015)       |
| <i>Smad1</i>               | Lung     | Mouse   | -/- Dysplasia                                                                                    | (Xu et al., 2011)         |
| <i>Smad5</i>               | Lung     | Mouse   | -/- No phenotype                                                                                 | (Xu et al., 2011)         |
| <i>Sna1</i>                | Vascular | Mouse   | -/- Aplasia                                                                                      | (Lomeli et al., 2009)     |

List of transcription factors may not be complete. *Pax*, paired box; *Pdx*, pancreatic and duodenal homeobox; *Ets*, E26 transformation-specific; *Fox*, forkhead box; *Trh*, tracheless; *Sox*, SRY-related HMG-box; *Ptf*, pancreas transcription factor; *Tcf*, T cell-factor; *Lef*, lymphoid enhancer binding factor; *Rar*, retinoic acid receptor; *Hes*, hairy and enhancer of split; *Nf*, nuclear factor; *Sna*, snail.

<sup>a</sup>SG, salivary glands.

<sup>b</sup>In hypothyroidism, sensorineural deafness, and renal dysplasia.

<sup>c</sup>Other phenotypes include neonatal and childhood-onset diabetes mellitus.

<sup>d</sup>In some cases, pulmonary hypoplasia or tracheopulmonary defects are observed.

<sup>e</sup>Other phenotypes include cerebellar agenesis and permanent neonatal diabetes mellitus.

<sup>f</sup>Downstream of Notch.

## References

- Ali, A., P.T. Christie, I.V. Grigorieva, B. Harding, H. Van Esch, S.F. Ahmed, M. Bitner-Grindzic, E. Blind, C. Bloch, P. Christin, et al. 2007. Functional characterization of GATA3 mutations causing the hypoparathyroidism-deafness-renal (HDR) dysplasia syndrome: insight into mechanisms of DNA binding by the GATA3 transcription factor. *Hum. Mol. Genet.* 16:265–275. <http://dx.doi.org/10.1093/hmg/ddl454>
- Bamshad, M., R.C. Lin, D.J. Law, W.C. Watkins, P.A. Krakowiak, M.E. Moore, P. Franceschini, R. Lala, L.B. Holmes, T.C. Gebuhr, et al. 1997. Mutations in human TBX3 alter limb, apocrine and genital development in ulnar-mammary syndrome. *Nat. Genet.* 16:311–315. <http://dx.doi.org/10.1038/ng0797-311>
- Barak, H., S.-H. Huh, S. Chen, C. Jeanpierre, J. Martinovic, M. Parisot, C. Bole-Feysot, P. Nitschké, R. Salomon, C. Antignac, et al. 2012. FGF9 and FGF20 maintain the stemness of nephron progenitors in mice and man. *Dev. Cell.* 22:1191–1207. <http://dx.doi.org/10.1016/j.devcel.2012.04.018>
- Basson, M.A., J. Watson-Johnson, R. Shakya, S. Akbulut, D. Hyink, F.D. Costantini, P.D. Wilson, I.J. Mason, and J.D. Licht. 2006. Branching morphogenesis of the ureteric epithelium during kidney development is coordinated by the opposing functions of GDNF and Sprouty1. *Dev. Biol.* 299:466–477. <http://dx.doi.org/10.1016/j.ydbio.2006.08.051>
- Baudino, T.A., C. McKay, H. Pendeveville-Samain, J.A. Nilsson, K.H. Maclean, E.L. White, A.C. Davis, J.N. Ihle, and J.L. Cleveland. 2002. c-Myc is essential for vasculogenesis and angiogenesis during development and tumor progression. *Genes Dev.* 16:2530–2543. <http://dx.doi.org/10.1101/gad.102460>
- Besnard, V., S.E. Wert, K.H. Kaestner, and J.A. Whitsett. 2005. Stage-specific regulation of respiratory epithelial cell differentiation by Foxa1. *Am. J. Physiol. Lung Cell. Mol. Physiol.* 289:L750–L759. <http://dx.doi.org/10.1152/ajplung.00151.2005>
- Bhatia-Gaur, R., A.A. Donjacour, P.J. Scivolino, M. Kim, N. Desai, P. Young, C.R. Norton, T. Gridley, R.D. Cardiff, G.R. Cunha, et al. 1999. Roles for Nkx3.1 in prostate development and cancer. *Genes Dev.* 13:966–977. <http://dx.doi.org/10.1101/gad.13.8.966>
- Bhushan, A., N. Itoh, S. Kato, J.P. Thiery, P. Czernichow, S. Bellusci, and R. Scharfmann. 2001. Fgf10 is essential for maintaining the proliferative capacity of epithelial progenitor cells during early pancreatic organogenesis. *Development.* 128:5109–5117.
- Biben, C., C.-C. Wang, and R.P. Harvey. 2002. NK-2 class homeobox genes and pharyngeal/oral patterning: Nkx2-3 is required for salivary gland and tooth morphogenesis. *Int. J. Dev. Biol.* 46:415–422.
- Bonnette, S.G., and D.L. Hadsell. 2001. Targeted disruption of the IGF-I receptor gene decreases cellular proliferation in mammary terminal end buds. *Endocrinology.* 142:4937–4945. <http://dx.doi.org/10.1210/endo.142.11.8500>
- Boström, H., A. Grilli-Linde, and C. Betsholtz. 2002. PDGF-A/PDGF α-receptor signaling is required for lung growth and the formation of alveoli but not for early lung branching morphogenesis. *Dev. Dyn.* 223:155–162. <http://dx.doi.org/10.1002/dvdy.1225>
- Brophy, P.D., L. Ostrom, K.M. Lang, and G.R. Dressler. 2001. Regulation of ureteric bud outgrowth by Pax2-dependent activation of the glial derived neurotrophic factor gene. *Development.* 128:4747–4756.
- Cain, J.E., and J.F. Bertram. 2006. Ureteric branching morphogenesis in BMP4 heterozygous mutant mice. *J. Anat.* 209:745–755. <http://dx.doi.org/10.1111/j.1469-7580.2006.00655.x>
- Caprioli, A., A. Villasenor, L.A. Wylie, C. Braitsch, L. Marty-Santos, D. Barry, C.M. Karner, S. Fu, S.M. Meadows, T.J. Carroll, and O. Cleaver. 2015. Wnt4 is essential to normal mammalian lung development. *Dev. Biol.* 406:222–234. <http://dx.doi.org/10.1016/j.ydbio.2015.08.017>
- Carroll, T.J., J.-S. Park, S. Hayashi, A. Majumdar, and A.P. McMahon. 2005. Wnt9b plays a central role in the regulation of mesenchymal to epithelial transitions underlying organogenesis of the mammalian urogenital system. *Dev. Cell.* 9:283–292. <http://dx.doi.org/10.1016/j.devcel.2005.05.016>
- Chang, D.R., D. Martinez Alanis, R.K. Miller, H. Ji, H. Akiyama, P.D. McCrea, and J. Chen. 2013. Lung epithelial branching program antagonizes alveolar differentiation. *Proc. Natl. Acad. Sci. USA.* 110:18042–18051. <http://dx.doi.org/10.1073/pnas.1311760110>
- Colvin, J.S., R.P. Green, J. Schmahl, B. Capel, and D.M. Ornitz. 2001a. Male-to-female sex reversal in mice lacking fibroblast growth factor 9. *Cell.* 104:875–889. [http://dx.doi.org/10.1016/S0092-8674\(01\)00284-7](http://dx.doi.org/10.1016/S0092-8674(01)00284-7)
- Colvin, J.S., A.C. White, S.J. Pratt, and D.M. Ornitz. 2001b. Lung hypoplasia and neonatal death in Fgf9-null mice identify this gene as an essential regulator of lung mesenchyme. *Development.* 128:2095–2106.
- Cost, N.G., A.T. Ludwig, D.T. Wilcox, D. Rakheja, S.J. Steinberg, and L.A. Baker. 2009. A novel SOX9 mutation, 972delC, causes 46,XY sex-reversed campomelic dysplasia with nephrocalcinosis, urolithiasis, and dysgerminoma. *J. Pediatr. Surg.* 44:451–454. <http://dx.doi.org/10.1016/j.jpedsurg.2008.10.003>
- Davenport, T.G., L.A. Jerome-Majewska, and V.E. Papaioannou. 2003. Mammary gland, limb and yolk sac defects in mice lacking Tbx3, the gene mutated in human ulnar mammary syndrome. *Development.* 130:2263–2273. <http://dx.doi.org/10.1242/dev.00431>
- Davis, M.A., and A.B. Reynolds. 2006. Blocked acinar development, E-cadherin reduction, and intraepithelial neoplasia upon ablation of p120-catenin in the mouse salivary gland. *Dev. Cell.* 10:21–31. <http://dx.doi.org/10.1016/j.devcel.2005.12.004>

- De Moerloose, L., B. Spencer-Dene, J.M. Revest, M. Hajihosseini, I. Rosewell, and C. Dickson. 2000. An important role for the IIIb isoform of fibroblast growth factor receptor 2 (FGFR2) in mesenchymal-epithelial signalling during mouse organogenesis. *Development*. 127:483–492.
- Douglas, N.C., and V.E. Papaioannou. 2013. The T-box transcription factors TBX2 and TBX3 in mammary gland development and breast cancer. *J. Mammary Gland Biol. Neoplasia*. 18:143–147. <http://dx.doi.org/10.1007/s10911-013-9282-8>
- Duan, D., Y. Yue, W. Zhou, B. Labed, T.C. Ritchie, R. Grosschedl, and J.F. Engelhardt. 1999. Submucosal gland development in the airway is controlled by lymphoid enhancer binding factor 1 (LEF1). *Development*. 126:4441–4453.
- Dudley, A.T., K.M. Lyons, and E.J. Robertson. 1995. A requirement for bone morphogenetic protein-7 during development of the mammalian kidney and eye. *Genes Dev*. 9:2795–2807. <http://dx.doi.org/10.1101/gad.9.22.2795>
- Eblaghie, M.C., M. Reedy, T. Oliver, Y. Mishina, and B.L.M. Hogan. 2006. Evidence that autocrine signaling through Bmpr1a regulates the proliferation, survival and morphogenetic behavior of distal lung epithelial cells. *Dev. Biol.* 291:67–82. <http://dx.doi.org/10.1016/j.ydbio.2005.12.006>
- Enomoto, H., T. Araki, A. Jackman, R.O. Heuckeroth, W.D. Snider, E.M. Johnson Jr., and J. Milbrandt. 1998. GFR  $\alpha$ 1-deficient mice have deficits in the enteric nervous system and kidneys. *Neuron*. 21:317–324. [http://dx.doi.org/10.1016/S0896-6273\(00\)80541-3](http://dx.doi.org/10.1016/S0896-6273(00)80541-3)
- Entesarian, M., H. Matsson, J. Klar, B. Bergendal, L. Olson, R. Arakaki, Y. Hayashi, H. Ohuchi, B. Falahat, A.I. Bolstad, et al. 2005. Mutations in the gene encoding fibroblast growth factor 10 are associated with aplasia of lacrimal and salivary glands. *Nat. Genet.* 37:125–127. <http://dx.doi.org/10.1038/ng1507>
- Foster, J.W., M.A. Dominguez-Steglich, S. Guioli, C. Kwok, P.A. Weller, M. Stevanović, J. Weissenbach, S. Mansour, I.D. Young, P.N. Goodfellow, et al. 1994. Campomelic dysplasia and autosomal sex reversal caused by mutations in an SRY-related gene. *Nature*. 372:525–530. <http://dx.doi.org/10.1038/372525a0>
- Grote, D., S.K. Boualia, A. Souabni, C. Merkel, X. Chi, F. Costantini, T. Carroll, and M. Bouchard. 2008. Gata3 acts downstream of beta-catenin signaling to prevent ectopic metanephric kidney induction. *PLoS Genet.* 4:e1000316. <http://dx.doi.org/10.1371/journal.pgen.1000316>
- Gründer, A., T.T. Ebel, M. Mallo, G. Schwarzkopf, T. Shimizu, A.E. Sippel, and H. Schrewe. 2002. Nuclear factor I-B (Nf1b) deficient mice have severe lung hypoplasia. *Mech. Dev.* 112:69–77. [http://dx.doi.org/10.1016/S0925-4773\(01\)00640-2](http://dx.doi.org/10.1016/S0925-4773(01)00640-2)
- Haumaitre, C., E. Barbacci, M. Jenny, M.O. Ott, G. Gradwohl, and S. Cereghini. 2005. Lack of TCF2/vHNF1 in mice leads to pancreas agenesis. *Proc. Natl. Acad. Sci. USA*. 102:1490–1495. <http://dx.doi.org/10.1073/pnas.0405776102>
- Hebrok, M., S.K. Kim, B. St Jacques, A.P. McMahon, and D.A. Melton. 2000. Regulation of pancreas development by hedgehog signaling. *Development*. 127:4905–4913.
- Heckman, B.M., G. Chakravarty, T. Vargo-Gogola, M. Gonzales-Rimbau, D.L. Hadsell, A.V. Lee, J. Settleman, and J.M. Rosen. 2007. Crosstalk between the p190-B RhoGAP and IGF signaling pathways is required for embryonic mammary bud development. *Dev. Biol.* 309:137–149. <http://dx.doi.org/10.1016/j.ydbio.2007.07.002>
- Isaac, D.D., and D.J. Andrew. 1996. Tubulogenesis in Drosophila: a requirement for the trachealess gene product. *Genes Dev*. 10:103–117. <http://dx.doi.org/10.1101/gad.10.1.103>
- Ito, T., N. Udaka, T. Yazawa, K. Okudela, H. Hayashi, T. Sudo, F. Guillemot, R. Kageyama, and H. Kitamura. 2000. Basic helix-loop-helix transcription factors regulate the neuroendocrine differentiation of fetal mouse pulmonary epithelium. *Development*. 127:3913–3921.
- Jackson, L.F., T.H. Qiu, S.W. Sunnarborg, A. Chang, C. Zhang, C. Patterson, and D.C. Lee. 2003. Defective valvulogenesis in HB-EGF and TACE-null mice is associated with aberrant BMP signaling. *EMBO J.* 22:2704–2716. <http://dx.doi.org/10.1093/emboj/cdg264>
- Jaskoll, T., and M. Melnick. 1999. Submandibular gland morphogenesis: stage-specific expression of TGF- $\alpha$ /EGF, IGF, TGF- $\beta$ , TNF, and IL-6 signal transduction in normal embryonic mice and the phenotypic effects of TGF- $\beta$ 2, TGF- $\beta$ 3, and EGF-r null mutations. *Anat. Rec.* 256:252–268. [http://dx.doi.org/10.1002/\(SICI\)1097-0185\(19991101\)256:3<252::AID-AR5>3.0.CO;2-6](http://dx.doi.org/10.1002/(SICI)1097-0185(19991101)256:3<252::AID-AR5>3.0.CO;2-6)
- Jaskoll, T., Y.-M. Zhou, G. Trump, and M. Melnick. 2003. Ectodysplasin receptor-mediated signaling is essential for embryonic submandibular salivary gland development. *Anat. Rec. A Discov. Mol. Cell. Evol. Biol.* 271:322–331. <http://dx.doi.org/10.1002/ar.a.10045>
- Jaskoll, T., T. Leo, D. Witcher, M. Ormestad, J. Astorga, P. Bringas Jr., P. Carlsson, and M. Melnick. 2004a. Sonic hedgehog signaling plays an essential role during embryonic salivary gland epithelial branching morphogenesis. *Dev. Dyn.* 229:722–732. <http://dx.doi.org/10.1002/dvdy.10472>
- Jaskoll, T., D. Witcher, L. Toreno, P. Bringas, A.M. Moon, and M. Melnick. 2004b. FGF8 dose-dependent regulation of embryonic submandibular salivary gland morphogenesis. *Dev. Biol.* 268:457–469. <http://dx.doi.org/10.1016/j.ydbio.2004.01.004>
- Jerome-Majewska, L.A., G.P. Jenkins, E. Ernstoff, F. Zindy, C.J. Sherr, and V.E. Papaioannou. 2005. Tbx3, the ulnar-mammary syndrome gene, and Tbx2 interact in mammary gland development through a p19Arf/p53-independent pathway. *Dev. Dyn.* 234:922–933. <http://dx.doi.org/10.1002/dvdy.20575>
- Kawaguchi, Y., B. Cooper, M. Gannon, M. Ray, R.J. MacDonald, and C.V.E. Wright. 2002. The role of the transcriptional regulator Ptf1a in converting intestinal to pancreatic progenitors. *Nat. Genet.* 32:128–134. <http://dx.doi.org/10.1038/ng959>
- Kere, J., A.K. Srivastava, O. Montonen, J. Zonana, N. Thomas, B. Ferguson, F. Munoz, D. Morgan, A. Clarke, P. Baybayan, et al. 1996. X-linked anhidrotic (hypohidrotic) ectodermal dysplasia is caused by mutation in a novel transmembrane protein. *Nat. Genet.* 13:409–416. <http://dx.doi.org/10.1038/ng0895-409>
- Klämbt, C., L. Glazer, and B.Z. Shilo. 1992. breathless, a Drosophila FGF receptor homolog, is essential for migration of tracheal and specific midline glial cells. *Genes Dev*. 6:1668–1678. <http://dx.doi.org/10.1101/gad.6.9.1668>
- Knosp, W.M., S.M. Knox, I.M.A. Lombaert, C.L. Haddox, V.N. Patel, and M.P. Hoffman. 2015. Submandibular parasympathetic gangliogenesis requires sprouty-dependent Wnt signals from epithelial progenitors. *Dev. Cell.* 32:667–677. <http://dx.doi.org/10.1016/j.devcel.2015.01.023>
- Krapp, A., M. Knöfler, B. Ledermann, K. Bürki, C. Berney, N. Zoerkler, O. Hagenbüchle, and P.K. Wellauer. 1998. The bHLH protein PTF1-p48 is essential for the formation of the exocrine and the correct spatial organization of the endocrine pancreas. *Genes Dev.* 12:3752–3763. <http://dx.doi.org/10.1101/gad.12.23.3752>
- Lange, A.W., H.M. Haitchi, T.D. LeCras, A. Sridharan, Y. Xu, S.E. Wert, J. James, N. Udell, P.J. Thurner, and J.A. Whitsett. 2014. Sox17 is required for normal pulmonary vascular morphogenesis. *Dev. Biol.* 387:109–120. <http://dx.doi.org/10.1016/j.ydbio.2013.11.018>
- Lango Allen, H., S.E. Flanagan, C. Shaw-Smith, E. De Franco, I. Akerman, R. Caswell, J. Ferrer, A.T. Hattersley, and S. Ellard. International Pancreatic Agenesis Consortium. 2011. GATA6 haploinsufficiency causes pancreatic agenesis in humans. *Nat. Genet.* 44:20–22. <http://dx.doi.org/10.1038/ng.1035>
- Lee, M.Y., A. Skoura, E.J. Park, S. Landskroner-Eiger, L. Jozsef, A.K. Luciano, T. Murata, S. Pasula, Y. Dong, M. Bouaouina, et al. 2014. Dynamitin 2 regulation of integrin endocytosis, but not VEGF signaling, is crucial for developmental angiogenesis. *Development*. 141:1465–1472. <http://dx.doi.org/10.1242/dev.104539>
- Li, M., C. Li, Y.H. Liu, Y. Xing, L. Hu, Z. Borok, K.Y.-C. Kwong, and P. Minoo. 2008. Mesodermal deletion of transforming growth factor- $\beta$  receptor II disrupts lung epithelial morphogenesis: cross-talk between TGF- $\beta$  and Sonic hedgehog pathways. *J. Biol. Chem.* 283:36257–36264. <http://dx.doi.org/10.1074/jbc.M806786200>
- Lomelí, H., C. Starling, and T. Gridley. 2009. Epiblast-specific Snai1 deletion results in embryonic lethality due to multiple vascular defects. *BMC Res. Notes*. 2:22. <http://dx.doi.org/10.1186/1756-0500-2-22>
- Lu, B.C., C. Cebrian, X. Chi, S. Kuure, R. Kuo, C.M. Bates, S. Arber, J. Hassell, L. MacNeil, M. Hoshi, et al. 2009. Etv4 and Etv5 are required downstream of GDNF and Ret for kidney branching morphogenesis. *Nat. Genet.* 41:1295–1302. <http://dx.doi.org/10.1038/ng.476>
- Mailleux, A.A., B. Spencer-Dene, C. Dillon, D. Ndiaye, C. Savona-Baron, N. Itoh, S. Kato, C. Dickson, J.P. Thiery, and S. Bellusci. 2002. Role of FGF10/FGFR2b signaling during mammary gland development in the mouse embryo. *Development*. 129:53–60.
- Majumdar, A., S. Vainio, A. Kispert, J. McMahon, and A.P. McMahon. 2003. Wnt11 and Ret/Gdnf pathways cooperate in regulating ureteric branching during metanephric kidney development. *Development*. 130:3175–3185. <http://dx.doi.org/10.1242/dev.00520>
- Mendelsohn, C., D. Lohnes, D. Décimo, T. Lufkin, M. LeMeur, P. Chambon, and M. Mark. 1994. Function of the retinoic acid receptors (RARs) during development (II). Multiple abnormalities at various stages of organogenesis in RAR double mutants. *Development*. 120:2749–2771.



- Meno, C., A. Shimono, Y. Saijoh, K. Yashiro, K. Mochida, S. Ohishi, S. Noji, H. Kondoh, and H. Hamada. 1998. *lefty-1* is required for left-right determination as a regulator of *lefty-2* and *nodal*. *Cell*. 94:287–297. [http://dx.doi.org/10.1016/S0092-8674\(00\)81472-5](http://dx.doi.org/10.1016/S0092-8674(00)81472-5)
- Miettinen, P.J., D. Warburton, D. Bu, J.S. Zhao, J.E. Berger, P. Minoo, T. Koivisto, L. Allen, L. Dobbs, Z. Werb, and R. Derynck. 1997. Impaired lung branching morphogenesis in the absence of functional EGF receptor. *Dev. Biol.* 186:224–236. <http://dx.doi.org/10.1006/dbio.1997.8593>
- Miettinen, P.J., M. Huotari, T. Koivisto, J. Ustinov, J. Palgi, S. Rasilainen, E. Lehtonen, J. Keski-Oja, and T. Otonkoski. 2000. Impaired migration and delayed differentiation of pancreatic islet cells in mice lacking EGF-receptors. *Development*. 127:2617–2627.
- Min, H., D.M. Danilenko, S.A. Scully, B. Bolon, B.D. Ring, J.E. Tarpley, M. DeRose, and W.S. Simonet. 1998. Fgf-10 is required for both limb and lung development and exhibits striking functional similarity to *Drosophila* branchless. *Genes Dev.* 12:3156–3161. <http://dx.doi.org/10.1101/gad.12.20.3156>
- Minoo, P., G. Su, H. Drum, P. Bringas, and S. Kimura. 1999. Defects in tracheoesophageal and lung morphogenesis in *Nkx2.1(-/-)* mouse embryos. *Dev. Biol.* 209:60–71. <http://dx.doi.org/10.1006/dbio.1999.9234>
- Miyazaki, Y., K. Oshima, A. Fogo, B.L.M. Hogan, and I. Ichikawa. 2000. Bone morphogenetic protein 4 regulates the budding site and elongation of the mouse ureter. *J. Clin. Invest.* 105:863–873. <http://dx.doi.org/10.1172/JCI8256>
- Moens, C.B., A.B. Auerbach, R.A. Conlon, A.L. Joyner, and J. Rossant. 1992. A targeted mutation reveals a role for N-myc in branching morphogenesis in the embryonic mouse lung. *Genes Dev.* 6:691–704. <http://dx.doi.org/10.1101/gad.6.5.691>
- Molkenkin, J.D., K.M. Tymitz, J.A. Richardson, and E.N. Olson. 2000. Abnormalities of the genitourinary tract in female mice lacking GATA5. *Mol. Cell. Biol.* 20:5256–5260. <http://dx.doi.org/10.1128/MCB.20.14.5256-5260.2000>
- Monreal, A.W., B.M. Ferguson, D.J. Headon, S.L. Street, P.A. Overbeek, and J. Zonana. 1999. Mutations in the human homologue of mouse *dl* cause autosomal recessive and dominant hypohidrotic ectodermal dysplasia. *Nat. Genet.* 22:366–369. <http://dx.doi.org/10.1038/11937>
- Napp, L.C., M. Augustynik, F. Paesler, K. Krishnasamy, J. Woiterski, A. Limbourg, J. Bauersachs, H. Drexler, F. Le Noble, and F.P. Limbourg. 2012. Extrinsic Notch ligand Delta-like 1 regulates tip cell selection and vascular branching morphogenesis. *Circ. Res.* 110:530–535. <http://dx.doi.org/10.1161/CIRCRESAHA.111.263319>
- Offield, M.F., T.L. Jetton, P.A. Labosky, M. Ray, R.W. Stein, M.A. Magnuson, B.L. Hogan, and C.V. Wright. 1996. PDX-1 is required for pancreatic outgrowth and differentiation of the rostral duodenum. *Development*. 122:983–995.
- Ohuchi, H., Y. Hori, M. Yamasaki, H. Harada, K. Sekine, S. Kato, and N. Itoh. 2000. FGF10 acts as a major ligand for FGF receptor 2 IIIb in mouse multi-organ development. *Biochem. Biophys. Res. Commun.* 277:643–649. <http://dx.doi.org/10.1006/bbrc.2000.3721>
- Patterson, L.T., M. Pembaur, and S.S. Potter. 2001. Hoxa11 and Hoxd11 regulate branching morphogenesis of the ureteric bud in the developing kidney. *Development*. 128:2153–2161.
- Pepicelli, C.V., P.M. Lewis, and A.P. McMahon. 1998. Sonic hedgehog regulates branching morphogenesis in the mammalian lung. *Curr. Biol.* 8:1083–1086. [http://dx.doi.org/10.1016/S0960-9822\(98\)70446-4](http://dx.doi.org/10.1016/S0960-9822(98)70446-4)
- Perantoni, A.O., O. Timofeeva, F. Naillat, C. Richman, S. Pajni-Underwood, C. Wilson, S. Vainio, L.F. Dove, and M. Lewandoski. 2005. Inactivation of FGF8 in early mesoderm reveals an essential role in kidney development. *Development*. 132:3859–3871. <http://dx.doi.org/10.1242/dev.01945>
- Pichel, J.G., L. Shen, H.Z. Sheng, A.-C. Granholm, J. Drago, A. Grinberg, E.J. Lee, S.P. Huang, M. Saarma, B.J. Hoffer, et al. 1996. Defects in enteric innervation and kidney development in mice lacking GDNF. *Nature*. 382:73–76. <http://dx.doi.org/10.1038/382073a0>
- Pietilä, I., R. Prunskaitė-Hyyryläinen, S. Kaisto, E. Tika, A.M. van Eerde, A.M. Salo, L. Garma, I. Miinalainen, W.F. Feitz, E.M.H.F. Bongers, et al. 2016. Wnt5a deficiency leads to anomalies in ureteric tree development, tubular epithelial cell organization and basement membrane integrity pointing to a role in kidney collecting duct patterning. *PLoS One*. 11:e0147171. <http://dx.doi.org/10.1371/journal.pone.0147171>
- Poladia, D.P., K. Kish, B. Kutay, D. Hains, H. Kegg, H. Zhao, and C.M. Bates. 2006. Role of fibroblast growth factor receptors 1 and 2 in the metanephric mesenchyme. *Dev. Biol.* 291:325–339. <http://dx.doi.org/10.1016/j.ydbio.2005.12.034>
- Qiao, J., H. Sakurai, and S.K. Nigam. 1999. Branching morphogenesis independent of mesenchymal-epithelial contact in the developing kidney. *Proc. Natl. Acad. Sci. USA*. 96:7330–7335. <http://dx.doi.org/10.1073/pnas.96.13.7330>
- Reardon, W., R.M. Winter, P. Rutland, L.J. Pulleyn, B.M. Jones, and S. Malcolm. 1994. Mutations in the fibroblast growth factor receptor 2 gene cause Crouzon syndrome. *Nat. Genet.* 8:98–103. <http://dx.doi.org/10.1038/ng0994-98>
- Reginensi, A., M. Clarkson, Y. Neirijnck, B. Lu, T. Ohyama, A.K. Groves, E. Sock, M. Wegner, F. Costantini, M.C. Chaboissier, and A. Schedl. 2011. SOX9 controls epithelial branching by activating RET effector genes during kidney development. *Hum. Mol. Genet.* 20:1143–1153. <http://dx.doi.org/10.1093/hmg/ddq558>
- Sanyanusin, P., L.A. Schimmenti, L.A. McNoe, T.A. Ward, M.E.M. Pierpont, M.J. Sullivan, W.B. Dobyns, and M.R. Eccles. 1995. Mutation of the PAX2 gene in a family with optic nerve colobomas, renal anomalies and vesicoureteral reflux. *Nat. Genet.* 9:358–364. <http://dx.doi.org/10.1038/ng0495-358>
- Schneider, A., T. Brand, R. Zweigerdt, and H. Arnold. 2000. Targeted disruption of the *Nkx3.1* gene in mice results in morphogenetic defects of minor salivary glands: parallels to glandular duct morphogenesis in prostate. *Mech. Dev.* 95:163–174. [http://dx.doi.org/10.1016/S0925-4773\(00\)00355-5](http://dx.doi.org/10.1016/S0925-4773(00)00355-5)
- Schuchardt, A., V. D'Agati, L. Larsson-Blomberg, F. Costantini, and V. Pachnis. 1994. Defects in the kidney and enteric nervous system of mice lacking the tyrosine kinase receptor Ret. *Nature*. 367:380–383. <http://dx.doi.org/10.1038/367380a0>
- Sellick, G.S., K.T. Barker, I. Stolte-Dijkstra, C. Fleischmann, R.J. Coleman, C. Garrett, A.L. Gloyn, E.L. Edghill, A.T. Hattersley, P.K. Wellauer, et al. 2004. Mutations in PTF1A cause pancreatic and cerebellar agenesis. *Nat. Genet.* 36:1301–1305. <http://dx.doi.org/10.1038/ng1475>
- Seymour, P.A., K.K. Freude, M.N. Tran, E.E. Mayes, J. Jensen, R. Kist, G. Scherer, and M. Sander. 2007. SOX9 is required for maintenance of the pancreatic progenitor cell pool. *Proc. Natl. Acad. Sci. USA*. 104:1865–1870. <http://dx.doi.org/10.1073/pnas.0609217104>
- Shaw-Smith, C., E. De Franco, H. Lango Allen, M. Batlle, S.E. Flanagan, M. Borowiec, C.E. Taplin, J. van Alfen-van der Velden, J. Cruz-Rojo, G. Perez de Nanclares, et al. 2014. GATA4 mutations are a cause of neonatal and childhood-onset diabetes. *Diabetes*. 63:2888–2894. <http://dx.doi.org/10.2337/db14-0061>
- Shih, H.P., P.A. Seymour, N.A. Patel, R. Xie, A. Wang, P.P. Liu, G.W. Yeo, M.A. Magnuson, and M. Sander. 2015. A gene regulatory network cooperatively controlled by Pdx1 and Sox9 governs lineage allocation of foregut progenitor cells. *Cell Reports*. 13:326–336. <http://dx.doi.org/10.1016/j.celrep.2015.08.082>
- Sims-Lucas, S., B. Cusack, J. Baust, V.P. Eswarakumar, H. Masatoshi, A. Takeuchi, and C.M. Bates. 2011. Fgfr1 and the IIIc isoform of Fgfr2 play critical roles in the metanephric mesenchyme mediating early inductive events in kidney development. *Dev. Dyn.* 240:240–249. <http://dx.doi.org/10.1002/dvdy.22501>
- Sock, E., S.D. Rettig, J. Enderich, M.R. Bösl, E.R. Tamm, and M. Wegner. 2004. Gene targeting reveals a widespread role for the high-mobility-group transcription factor Sox11 in tissue remodeling. *Mol. Cell. Biol.* 24:6635–6644. <http://dx.doi.org/10.1128/MCB.24.15.6635-6644.2004>
- Stark, K., S. Vainio, G. Vassileva, and A.P. McMahon. 1994. Epithelial transformation of metanephric mesenchyme in the developing kidney regulated by Wnt-4. *Nature*. 372:679–683. <http://dx.doi.org/10.1038/372679a0>
- Sternlicht, M.D., S.W. Sunnarborg, H. Kouros-Mehr, Y. Yu, D.C. Lee, and Z. Werb. 2005. Mammary ductal morphogenesis requires paracrine activation of stromal EGFR via ADAM17-dependent shedding of epithelial amphiregulin. *Development*. 132:3923–3933. <http://dx.doi.org/10.1242/dev.01966>
- Sutherland, D., C. Samakowis, and M.A. Krasnow. 1996. branchless encodes a *Drosophila* FGF homolog that controls tracheal cell migration and the pattern of branching. *Cell*. 87:1091–1101. [http://dx.doi.org/10.1016/S0092-8674\(00\)81803-6](http://dx.doi.org/10.1016/S0092-8674(00)81803-6)
- Tang, N., W.F. Marshall, M. McMahon, R.J. Metzger, and G.R. Martin. 2011. Control of mitotic spindle angle by the RAS-regulated ERK1/2 pathway determines lung tube shape. *Science*. 333:342–345. <http://dx.doi.org/10.1126/science.1204831>
- Vincent, S., E. Ruberte, N.C. Grieder, C.K. Chen, T. Haerry, R. Schuh, and M. Affolter. 1997. DPP controls tracheal cell migration along the dorsoventral body axis of the *Drosophila* embryo. *Development*. 124:2741–2750.

- Wan, H., K.H. Kaestner, S.-L. Ang, M. Ikegami, F.D. Finkelman, M.T. Stahlman, P.C. Fulkerson, M.E. Rothenberg, and J.A. Whitsett. 2004. Foxa2 regulates alveolarization and goblet cell hyperplasia. *Development*. 131:953–964. <http://dx.doi.org/10.1242/dev.00966>
- Wan, H., S. Dingle, Y. Xu, V. Besnard, K.H. Kaestner, S.-L. Ang, S. Wert, M.T. Stahlman, and J.A. Whitsett. 2005. Compensatory roles of Foxa1 and Foxa2 during lung morphogenesis. *J. Biol. Chem.* 280:13809–13816. <http://dx.doi.org/10.1074/jbc.M414122200>
- Watt, A.J., R. Zhao, J. Li, and S.A. Duncan. 2007. Development of the mammalian liver and ventral pancreas is dependent on GATA4. *BMC Dev. Biol.* 7:37. <http://dx.doi.org/10.1186/1471-213X-7-37>
- Weinstein, M., X. Xu, K. Ohyama, and C.X. Deng. 1998. FGFR-3 and FGFR-4 function cooperatively to direct alveogenesis in the murine lung. *Development*. 125:3615–3623.
- Wiesen, J.F., P. Young, Z. Werb, and G.R. Cunha. 1999. Signaling through the stromal epidermal growth factor receptor is necessary for mammary ductal development. *Development*. 126:335–344.
- Wilson, M.E., K.Y. Yang, A. Kalousova, J. Lau, Y. Kosaka, F.C. Lynn, J. Wang, C. Mrejen, V. Episkopou, H.C. Clevers, and M.S. German. 2005. The HMG box transcription factor Sox4 contributes to the development of the endocrine pancreas. *Diabetes*. 54:3402–3409. <http://dx.doi.org/10.2337/diabetes.54.12.3402>
- Xu, B., C. Chen, H. Chen, S.-G. Zheng, P. Bringas Jr., M. Xu, X. Zhou, D. Chen, L. Umans, A. Zwijsen, and W. Shi. 2011. Smad1 and its target gene Wif1 coordinate BMP and Wnt signaling activities to regulate fetal lung development. *Development*. 138:925–935. <http://dx.doi.org/10.1242/dev.062687>
- Xuan, S., M.J. Borok, K.J. Decker, M.A. Battle, S.A. Duncan, M.A. Hale, R.J. Macdonald, and L. Sussel. 2012. Pancreas-specific deletion of mouse Gata4 and Gata6 causes pancreatic agenesis. *J. Clin. Invest.* 122:3516–3528. <http://dx.doi.org/10.1172/JCI63352>
- Yamamoto, H., E.J. Yun, H.-P. Gerber, N. Ferrara, J.A. Whitsett, and T.H. Vu. 2007. Epithelial-vascular cross talk mediated by VEGF-A and HGF signaling directs primary septae formation during distal lung morphogenesis. *Dev. Biol.* 308:44–53. <http://dx.doi.org/10.1016/j.ydbio.2007.04.042>
- Yu, J., T.J. Carroll, J. Rajagopal, A. Kobayashi, Q. Ren, and A.P. McMahon. 2009. A Wnt7b-dependent pathway regulates the orientation of epithelial cell division and establishes the cortico-medullary axis of the mammalian kidney. *Development*. 136:161–171. <http://dx.doi.org/10.1242/dev.022087>
- Zhao, J., H. Chen, J.J. Peschon, W. Shi, Y. Zhang, S.J. Frank, and D. Warburton. 2001. Pulmonary hypoplasia in mice lacking tumor necrosis factor-alpha converting enzyme indicates an indispensable role for cell surface protein shedding during embryonic lung branching morphogenesis. *Dev. Biol.* 232:204–218. <http://dx.doi.org/10.1006/dbio.2001.0176>
- Zhou, S., S. Degan, E.N. Potts, W.M. Foster, and M.E. Sunday. 2009. NPAS3 is a trachealess homolog critical for lung development and homeostasis. *Proc. Natl. Acad. Sci. USA*. 106:11691–11696. <http://dx.doi.org/10.1073/pnas.0902426106>
